# Supplementary material for: A novel hydrazide Schiff base self-assembled nanoprobe for selective detection of human serum albumin and its applications in renal disease surveillance
Source: Royal Society of Chemistry journal article supplement (doi:10.1039/d0tb01411g), 2020-01-01
Supplement: d0tb01411g1.pdf [file d0tb01411g1.pdf]

## Supplementary Material

### **A novel hydrazone Schiff base self-assembled nanoprobe for selective detection of human serum albumin and its applications in renal disease surveillance**

Zhi-Gang Wang<sup>a,1</sup>, Xiao-Jing Yan<sup>a,1</sup>, Hai-Bo Liu<sup>b</sup>, De-Long Zhang<sup>c</sup>, Wei Liu<sup>d</sup>,

Cheng-Zhi Xie<sup>a,\*</sup>, Qing-Zhong Li<sup>e</sup>, Jing-Yuan Xu<sup>a,\*</sup>

<sup>a</sup>Tianjin Key Laboratory on Technologies Enabling Development of Clinical Therapeutics and Diagnostics, School of Pharmacy, Tianjin Medical University, Tianjin 300070, P. R. China.

<sup>b</sup>Institute of Medicinal Plant Development, Chinese Academy of Medical Sciences, Peking Union Medical College, Beijing 100193, P. R. China.

<sup>c</sup>Department of Pharmacy, Tianjin Santan Hospital, Tianjin 300193, P. R. China.

<sup>d</sup>The Second Hospital of Tianjin Medical University, Tianjin 300211, P.R. China.

<sup>e</sup>The Laboratory of Theoretical and Computational Chemistry, School of Chemistry and Chemical Engineering, Yantai University, Yantai 264005, P.R. China.

<sup>1</sup>These authors contributed equally.

Corresponding author. E-mail address: [xichengzhi@tmu.edu.cn](mailto:xichengzhi@tmu.edu.cn) (C.-Z. Xie),  
[xujingyuan@tmu.edu.cn](mailto:xujingyuan@tmu.edu.cn) (J.-Y. Xu)



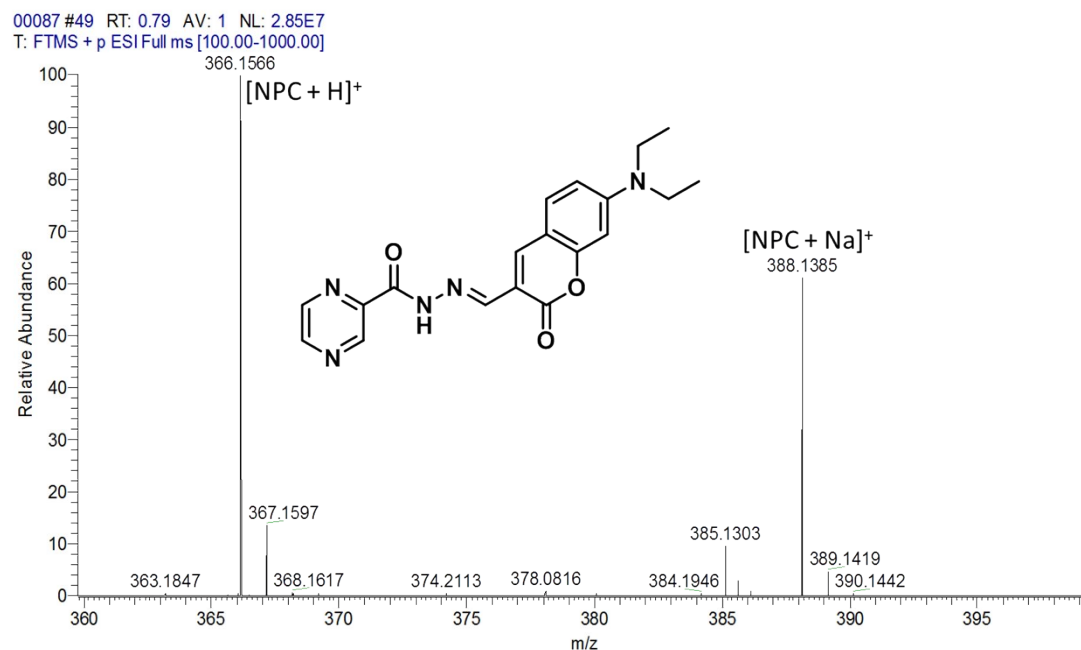

**Fig. S3.** ESI-MS spectrum of probe NPC.

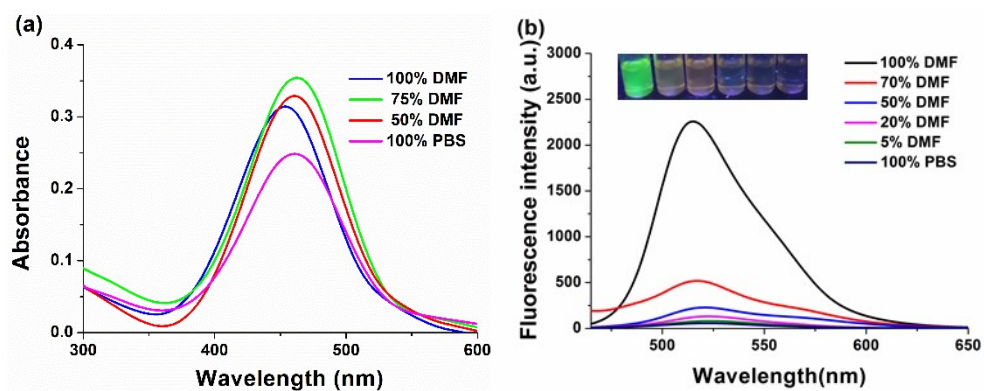

**Fig. S4.** (a) UV-vis absorption spectra of NPC (5  $\mu\text{M}$ ) in DMF/PBS buffer solution (pH 7.4) with different DMF fractions. (b) The fluorescence emission spectra of NPC (5  $\mu\text{M}$ ) in DMF/PBS buffer solution (pH 7.4) with different DMF fractions. Inset: photograph for corresponding color changes of NPC in solutions with different DMF fractions under 365 nm UV light. ( $\lambda_{\text{ex}} = 450 \text{ nm}$ , slit: 5 nm/5 nm).

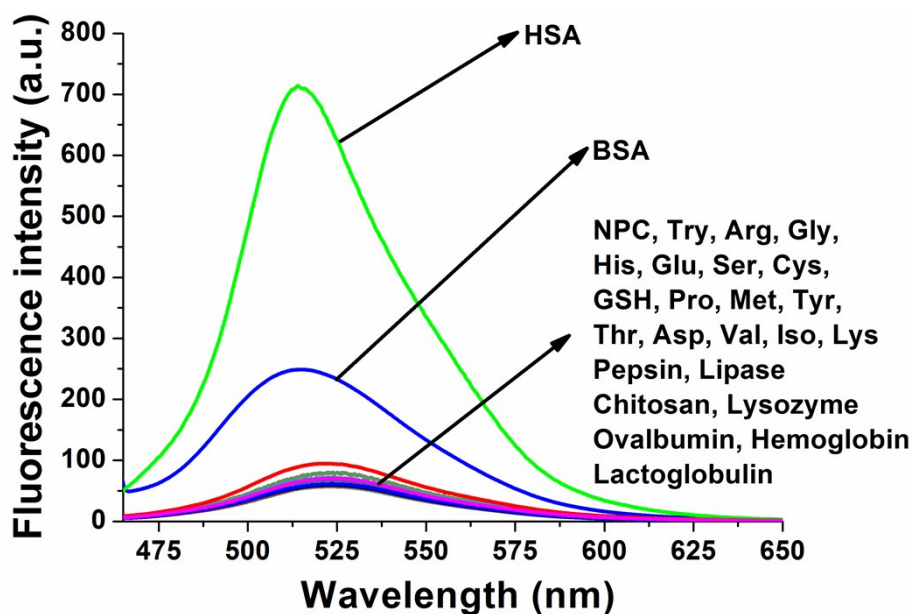

**Fig. S5.** The fluorescence emission spectra of NPC (5  $\mu\text{M}$ ) upon addition of 1 equiv. HSA, other proteins (5 equiv. for BSA) and various amino acid in PBS (pH 7.4) buffer solution ( $\lambda_{\text{ex}} = 450 \text{ nm}$ , slit: 5 nm/5 nm).

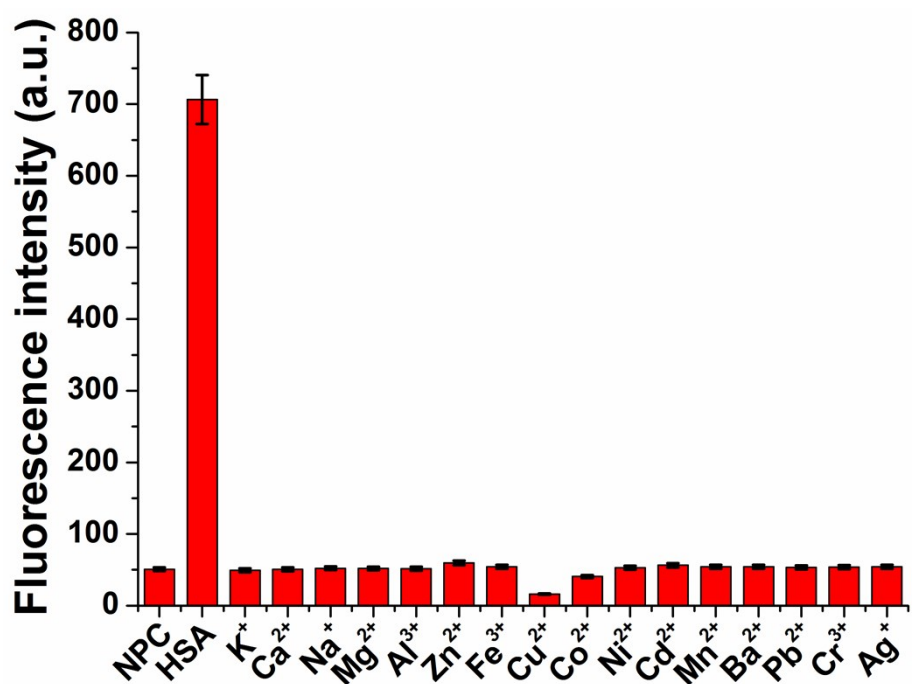

**Fig. S6.** The selectivity of NPC (5  $\mu\text{M}$ ) to 1 equiv. HSA from various metal ions (5  $\mu\text{M}$ ) in PBS (pH 7.4) buffer solution. ( $\lambda_{\text{ex}} = 450 \text{ nm}$ ,  $\lambda_{\text{em}} = 513 \text{ nm}$ , slit: 5 nm/5 nm).

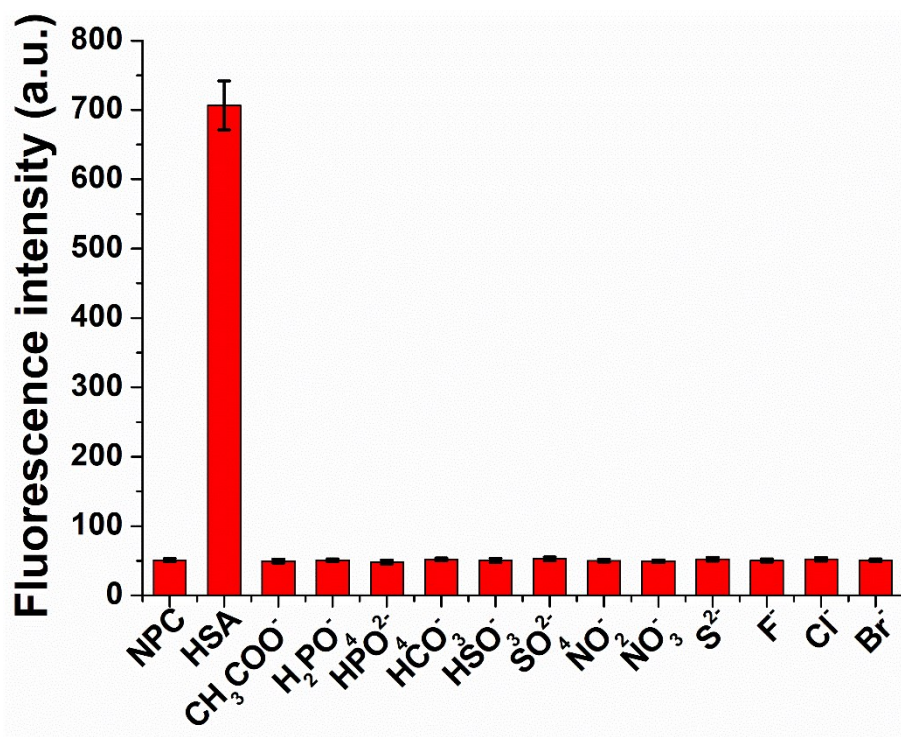

**Fig. S7.** The selectivity of NPC (5  $\mu\text{M}$ ) to 1 equiv. HSA from various anions (5  $\mu\text{M}$ ) in PBS (pH 7.4) buffer solution ( $\lambda_{\text{ex}} = 450 \text{ nm}$ ,  $\lambda_{\text{em}} = 513 \text{ nm}$ , slit: 5 nm/5 nm).

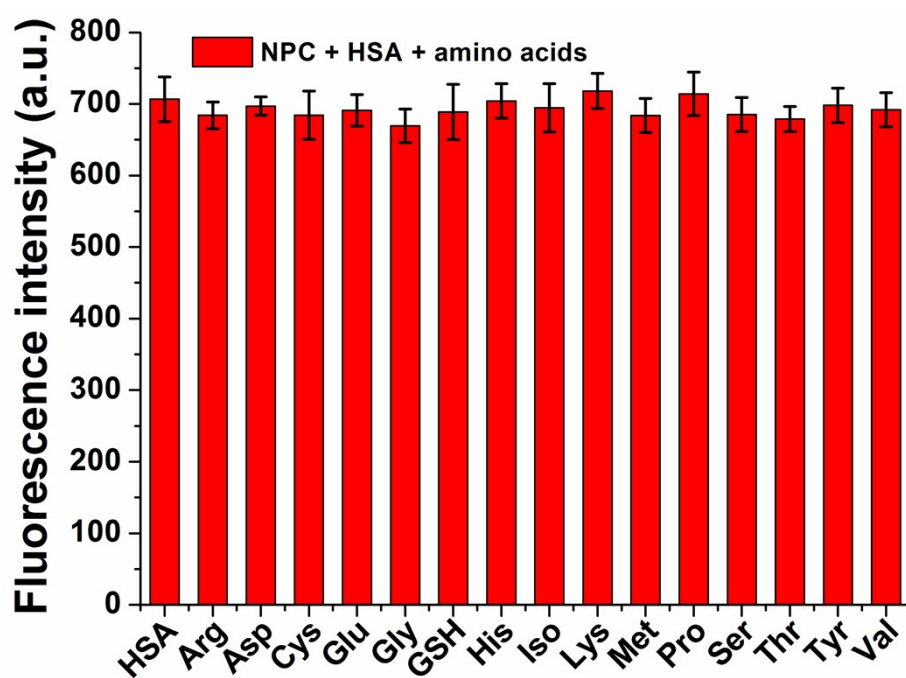

**Fig. S8.** The fluorescence responses of NPC (5  $\mu\text{M}$ ) to 1 equiv. HSA with the addition of various amino acids (5  $\mu\text{M}$ ) in PBS (pH 7.4) buffer solution ( $\lambda_{\text{ex}} = 450 \text{ nm}$ ,  $\lambda_{\text{em}} = 513 \text{ nm}$ , slit: 5 nm/5 nm).

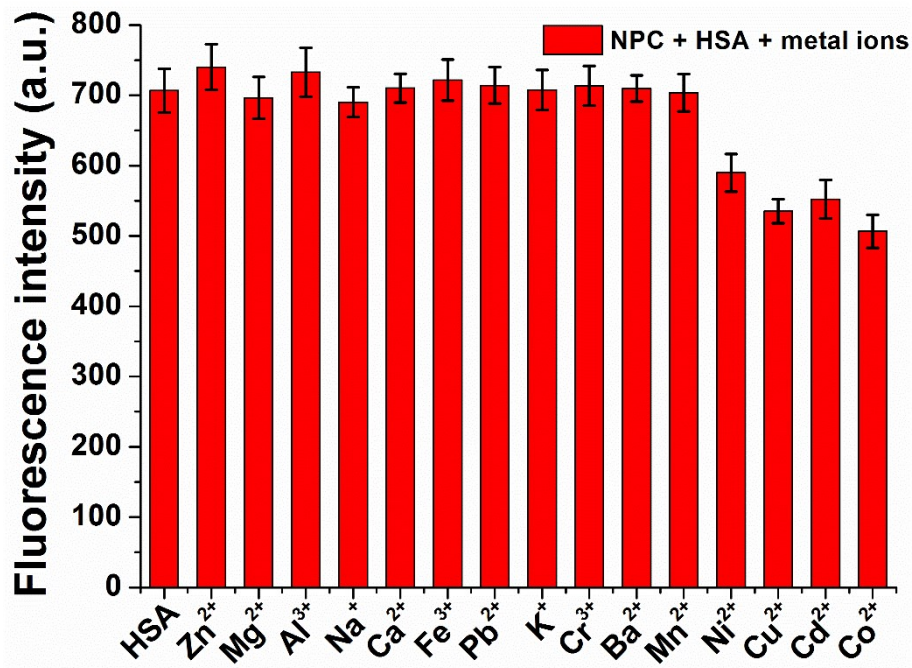

**Fig. S9.** The fluorescence responses of NPC (5  $\mu$ M) to 1 equiv. HSA with the addition of various metal ions (5  $\mu$ M) in PBS (pH 7.4) buffer solution ( $\lambda_{\text{ex}} = 450$  nm,  $\lambda_{\text{em}} = 513$  nm, slit: 5 nm/5 nm).

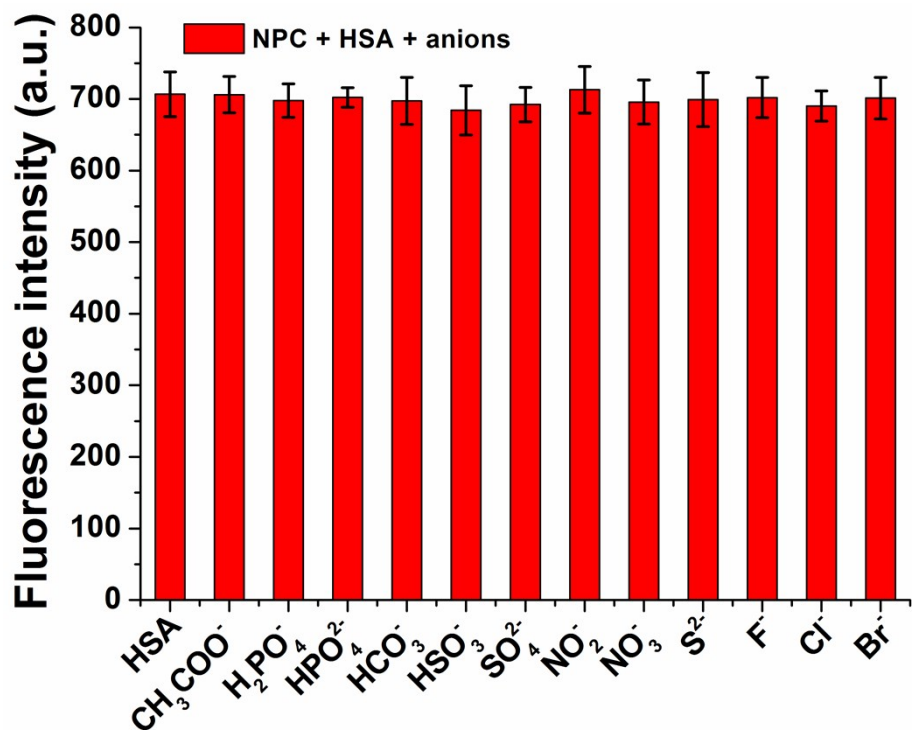

**Fig. S10.** The fluorescence responses of NPC (5  $\mu$ M) to 1 equiv. HSA with the addition of various anions (5  $\mu$ M) in PBS (pH 7.4) buffer solution ( $\lambda_{\text{ex}} = 450$  nm,  $\lambda_{\text{em}} = 513$  nm, slit: 5 nm/5 nm).



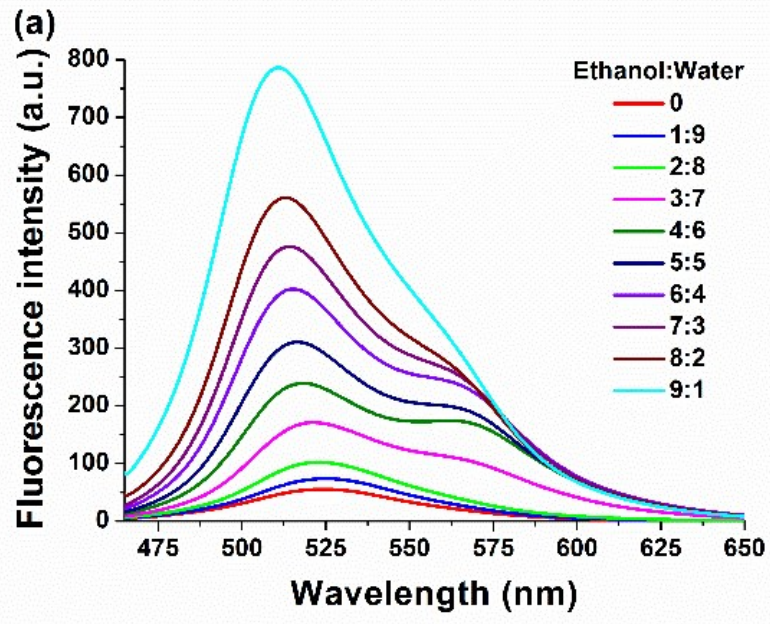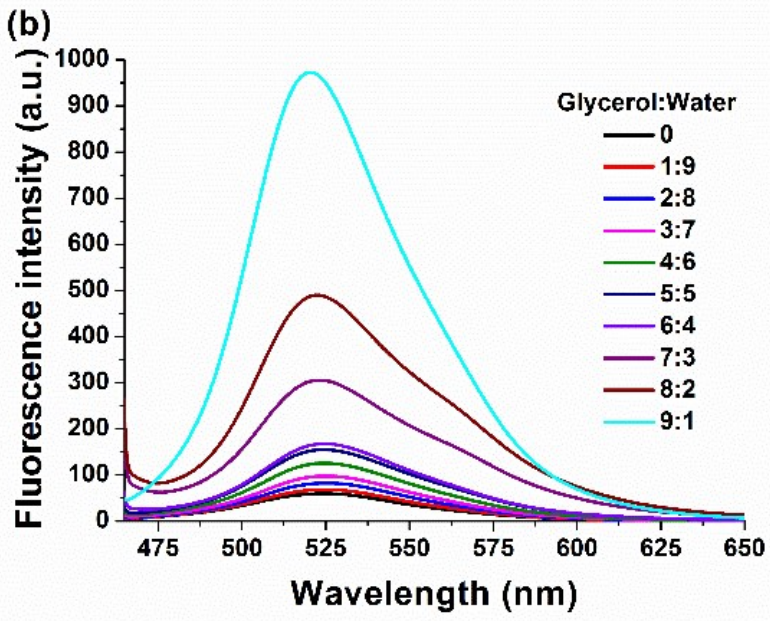

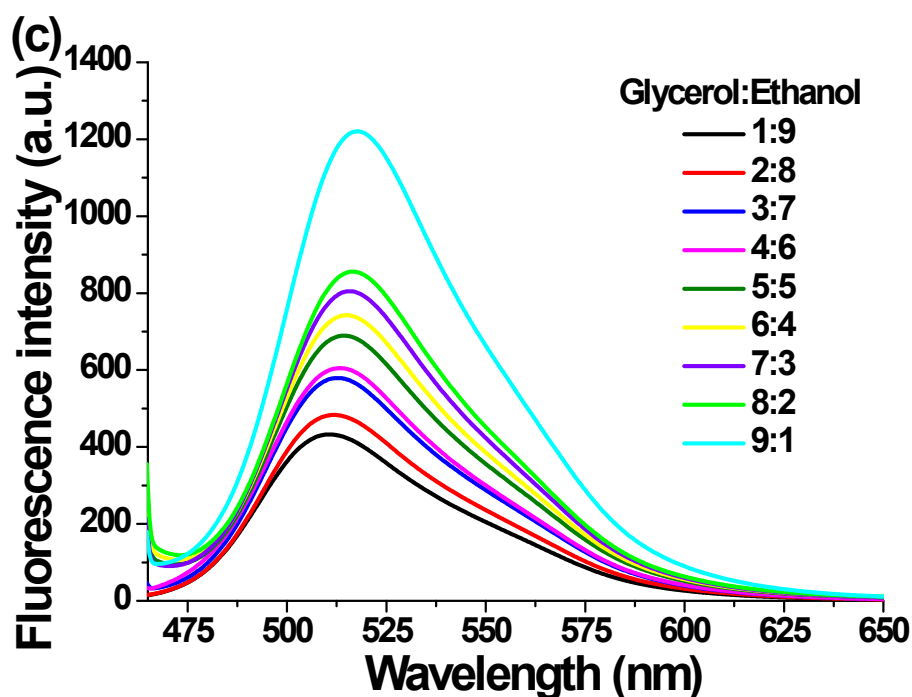

**Fig. S11.** The fluorescence spectra of NPC (5  $\mu$ M) in different volume ratio of ethanol/water (a), glycerol/water (b) and methanol-glycerol (c) from 1:9 to 9:1 for studying the influence of polarity and viscosity on NPC, respectively ( $\lambda_{\text{ex}} = 450$  nm, slit: 5 nm/5 nm).

### Time-resolved fluorescence analysis

During the time-resolved fluorescence analysis, the curves generated for fluorescence lifetime intensity decay were fitted to the following equation to estimate the lifetime of the samples.

$$R(t) = \sum_{i=1}^n \alpha_i \exp\left(-\frac{t}{\tau_i}\right)$$

Where,  $\alpha_i$  denotes the pre-exponential factors of the  $i_{\text{th}}$  component and  $\tau_i$  is its relative lifetime and  $n$  is the number of distinct decay components. Again, the mean lifetimes ( $\tau_m$ ) of the samples were calculated using the following equation.

$$\tau_m = \alpha_1 \tau_1 + \alpha_2 \tau_2$$



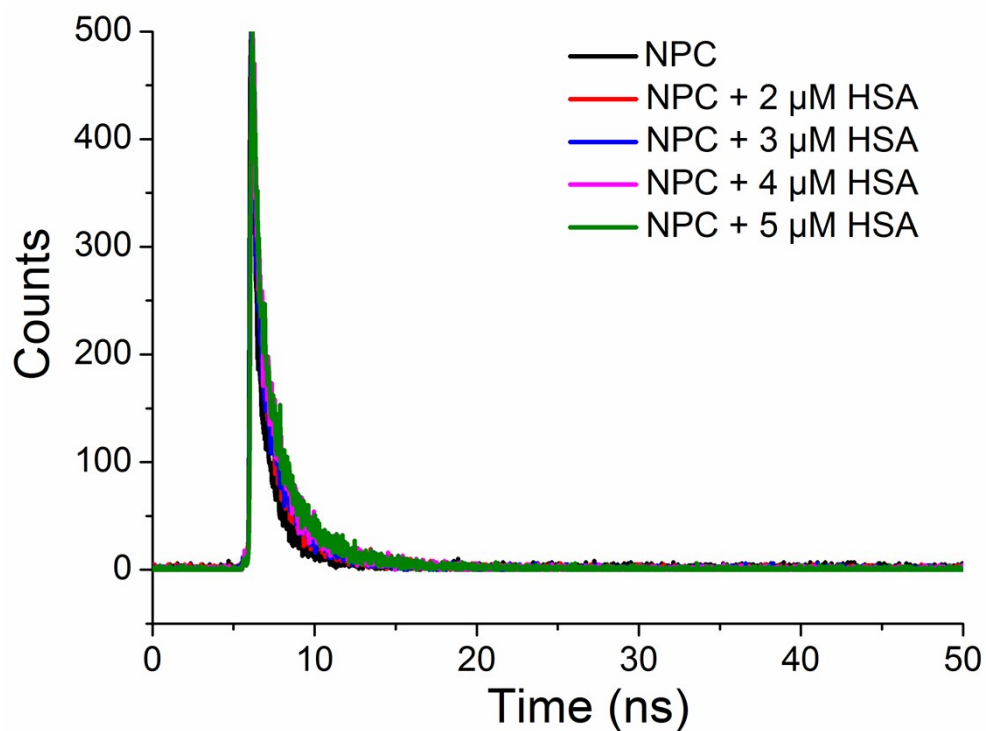

**Fig. S12.** Time-resolved fluorescence decay spectra of NPC (5  $\mu\text{M}$ ) in the absence and with the incremental addition of HSA (0–5  $\mu\text{M}$ ) ( $\lambda_{\text{ex}} = 450 \text{ nm}$ ,  $\lambda_{\text{em}} = 513 \text{ nm}$ ).

**Table S1.** Fluorescence lifetime decay parameters of NPC (5  $\mu\text{M}$ ) with gradual addition of HSA.

| System  | [HSA] ( $\mu\text{M}$ ) | $\tau_1$ (ns) | $\alpha_1$ (%) | $\tau_2$ (ns) | $\alpha_2$ (%) | $\tau_m$ (ns) | $\chi^2$ |
|---------|-------------------------|---------------|----------------|---------------|----------------|---------------|----------|
| NPC-HSA | 0                       | 0.29          | 23.35          | 1.44          | 76.65          | 1.17          | 1.082    |
|         | 2                       | 0.44          | 25.15          | 2.00          | 74.85          | 1.61          | 1.034    |
|         | 3                       | 0.39          | 20.08          | 2.00          | 79.92          | 1.68          | 1.012    |
|         | 4                       | 0.33          | 14.09          | 1.92          | 85.91          | 1.70          | 1.080    |
|         | 5                       | 0.37          | 15.35          | 2.06          | 84.65          | 1.80          | 1.000    |

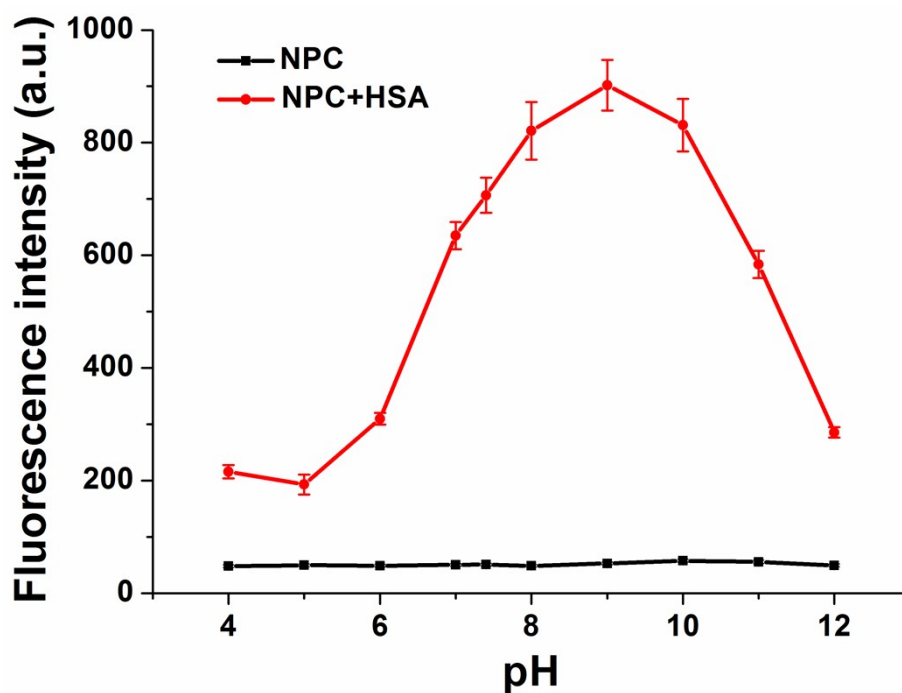

**Fig. S13.** The influence of pH value in the range of 2–12 on the fluorescence spectra of NPC (5  $\mu\text{M}$ ) in the absence and presence of 1 equiv. HSA in PBS (pH 7.4) buffer solution ( $\lambda_{\text{ex}} = 450 \text{ nm}$ ,  $\lambda_{\text{em}} = 513 \text{ nm}$ , slit: 5 nm/5 nm).

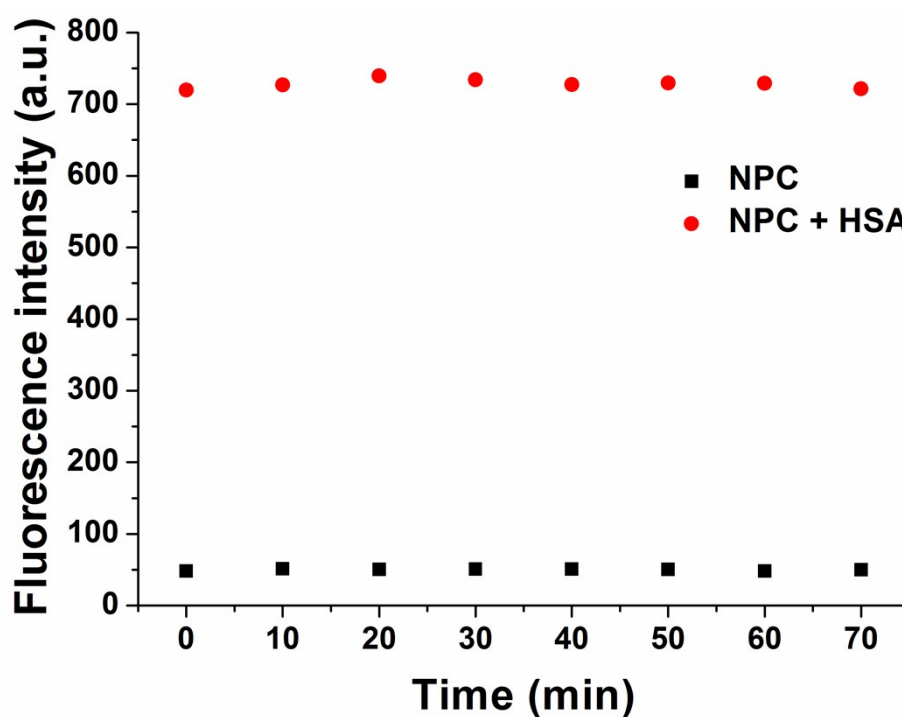

**Fig. S14.** The fluorescence intensity of NPC (5  $\mu\text{M}$ ) in the absence and presence of 1 equiv. HSA during 70 min in PBS (pH 7.4) buffer solution for stability measurement ( $\lambda_{\text{ex}} = 450 \text{ nm}$ ,  $\lambda_{\text{em}} = 513 \text{ nm}$ , slit: 5 nm/5 nm).

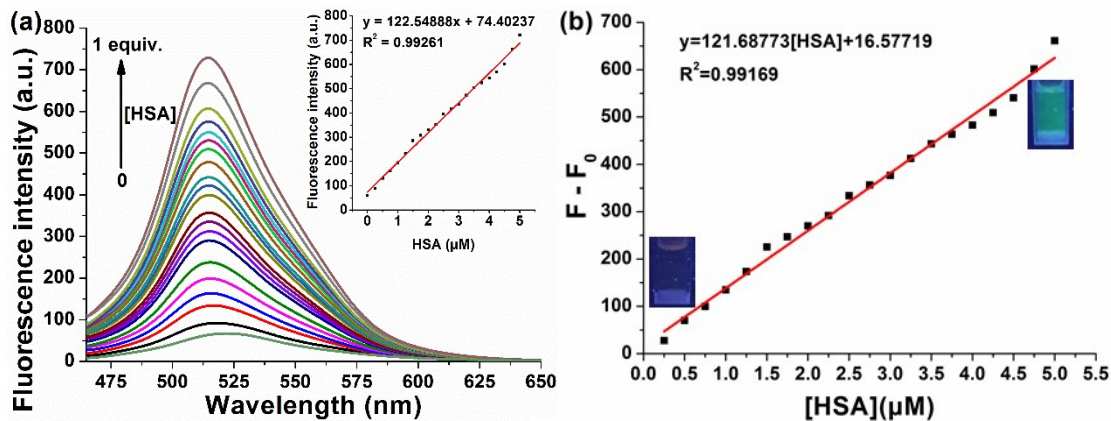

**Fig. S15.** (a) The fluorescence emission spectra of NPC (5  $\mu\text{M}$ ) with the addition of different concentrations of HSA (0–1 equiv.) in PBS buffer solution (pH = 7.4). (b) The linear relationship between fluorescence intensity changes of probe NPC (5  $\mu\text{M}$ ) at 513 nm and HSA concentrations in the range of 0–5  $\mu\text{M}$ . ( $\lambda_{\text{ex}}$  = 450 nm, slit: 5 nm/5 nm).

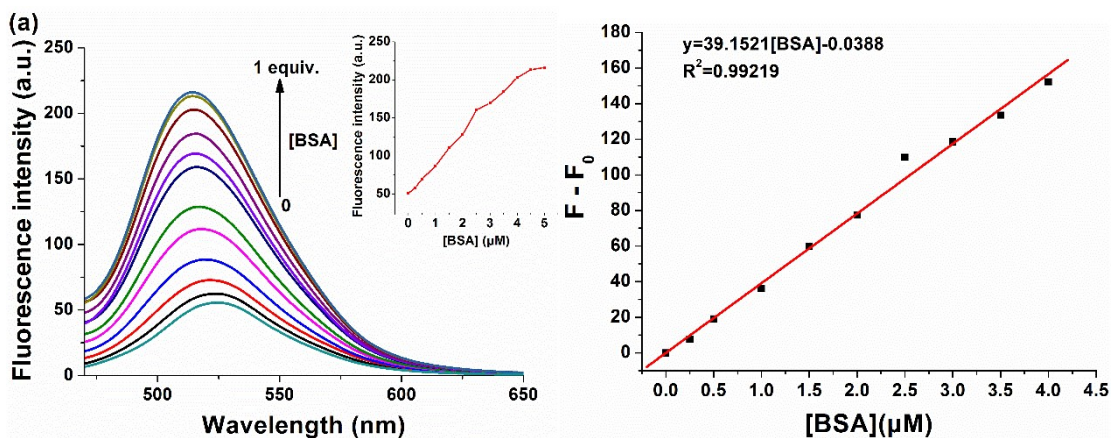

**Fig. S16.** (a) The fluorescence emission spectra changes of probe NPC (5  $\mu\text{M}$ ) in PBS (pH 7.4) buffer solution after gradually increasing the concentrations of BSA (0–5  $\mu\text{M}$ ). The inset shows the fluorescence intensity of NPC at 517 nm vs. BSA concentrations. (b) The fluorescence intensity changes of NPC (5  $\mu\text{M}$ ) at 517 nm as a linear function of BSA (0–4  $\mu\text{M}$ ) in PBS (pH 7.4) buffer solution. The inset shows the corresponding color changes of NPC with the increasing concentrations of BSA ( $\lambda_{\text{ex}}$  = 450 nm, slit: 5 nm/5 nm).

## HSA binding studies

To better understand the interaction of **NPC** with HSA, the fluorescence quenching data was analyzed with the linear Stern–Volmer equation:

$$F_0/F = 1 + k_q\tau_0[Q] = 1 + K_{SV}[Q]$$

where  $F_0$  and  $F$  represent the fluorescence intensity of HSA in the absence and presence of **NPC** which acted as quencher,  $k_q$  is the quenching rate constant,  $\tau_0$  denote the average lifetime of the HSA without quencher (about  $10^{-8}$  s),  $[Q]$  is the concentration of probe **NPC** and  $K_{SV}$  is the Stern–Volmer quenching constant. As shown in Fig. S19a, the fluorescence intensity of HSA was gradually quenched by probe **NPC** and  $K_{SV}$  can be obtained from the slope of  $F_0/F$  vs.  $[Q]$  (Fig. S19a inset). From the  $k_q$  values, we can know the quenching process of HSA by **NPC** is a static or dynamic quenching process. The number of binding sites and the binding constant of **NPC** with HSA could be determined from the Scatchard equation:

$$\log[(F_0-F)/F] = \log K_b + n \log[Q]$$

where  $K_b$  and  $n$  stand for the binding constant and binding sites, respectively. And the  $K_b$  and  $n$  can be obtained from the intercept and slope of  $\log[(F_0-F)/F]$  vs.  $\log[Q]$ , respectively.

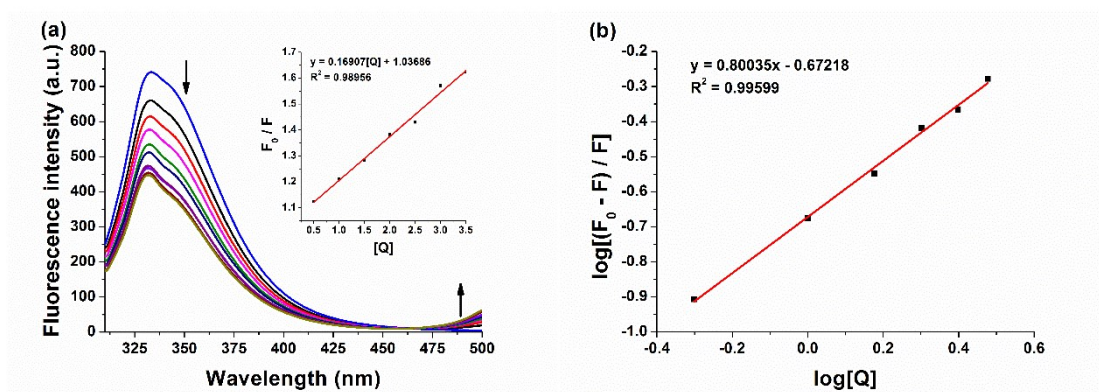

**Fig. S17.** (a) The fluorescence quenching of HSA (2 μM) with the addition of probe **NPC** (0–4 μM) in PBS (pH 7.4) buffer solution. Inset: Stern–Volmer plot of the fluorescence quenching of HSA induced by probe **NPC**. (b) The Modified Stern–Volmer plot of the fluorescence quenching of HSA induced by probe **NPC** in PBS (pH 7.4) buffer solution. ( $\lambda_{ex} = 295$  nm,  $\lambda_{em} = 332$  nm, slit: 5 nm/5 nm).

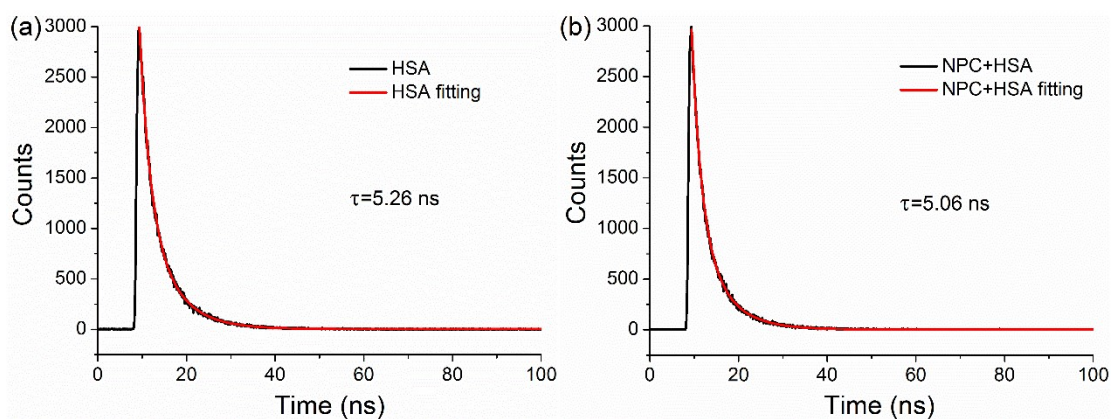

**Fig. S18.** Fluorescence lifetime tests (black line) and corresponding fittings (red line) of HSA in the absence (a) and the presence (b) of NPC in PBS (10 mM, pH 7.4).  $\lambda_{\text{ex}} = 295$  nm,  $\lambda_{\text{em}} = 332$  nm.

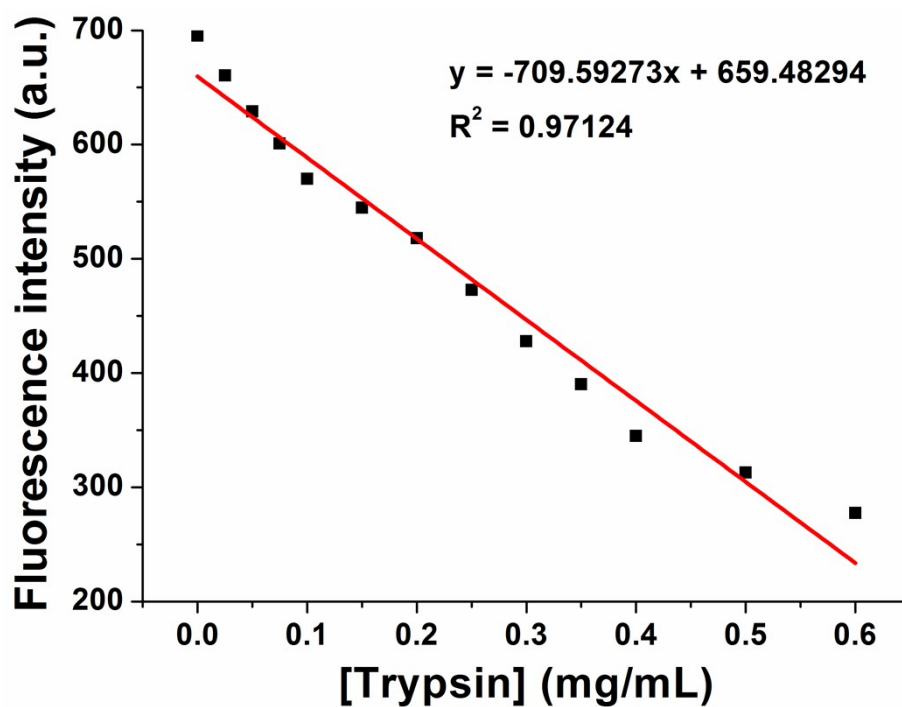

**Fig. S19.** The linear relationship of the fluorescence intensity with trypsin concentrations (0–0.65 mg/mL) in PBS buffer solution ( $\lambda_{\text{ex}} = 450$  nm,  $\lambda_{\text{em}} = 513$  nm, slit: 5 nm/5 nm).

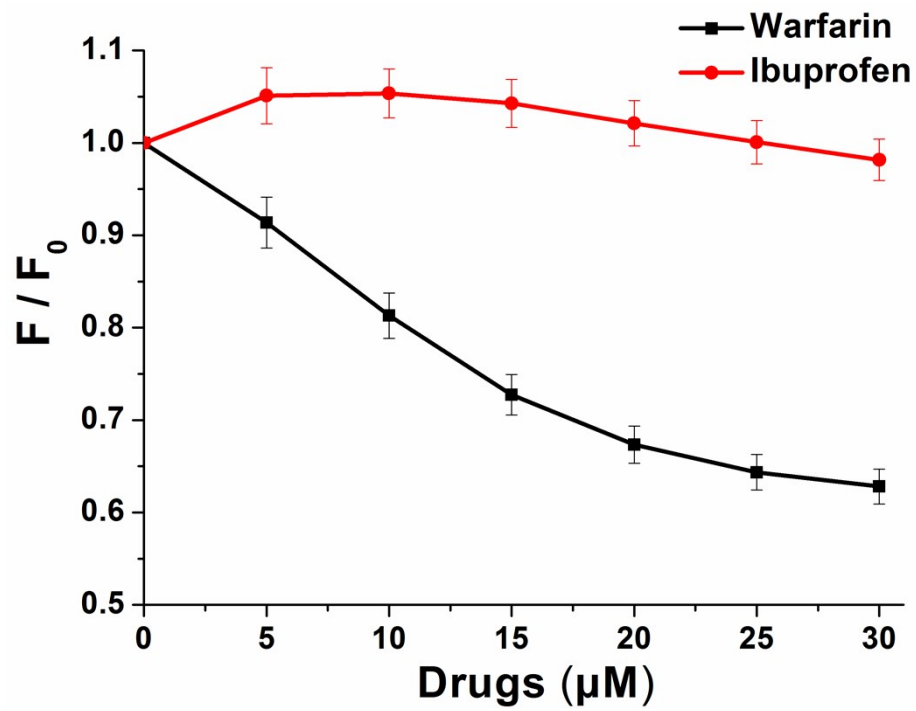

**Fig. S20.** The competitive displacement effect of site-specific drugs warfarin and ibuprofen for NPC-HSA complex (5  $\mu\text{M}$  NPC and 5  $\mu\text{M}$  HSA) ( $\lambda_{\text{ex}} = 450 \text{ nm}$ ,  $\lambda_{\text{em}} = 513 \text{ nm}$ , slit: 5 nm/5 nm).
